# Supplementary material for: Reducing geographic inequalities in access times for acute treatment of myocardial infarction in a large country: the example of Russia
Source: PubMed Central journal article supplement (PMC6208271; doi:10.1093/ije/dyy146), 2018-08-01
Supplement: dyy146_suppl_data.pdf [file dyy146_suppl_data.pdf]

**SUPPLEMENTARY MATERIAL**

**Figure S-1. Modelling driving time to the closest PCI facility *within the region* (left) and to any closest PCI facility *ignoring administrative borders* (example of Bashkortostan, 2015).**

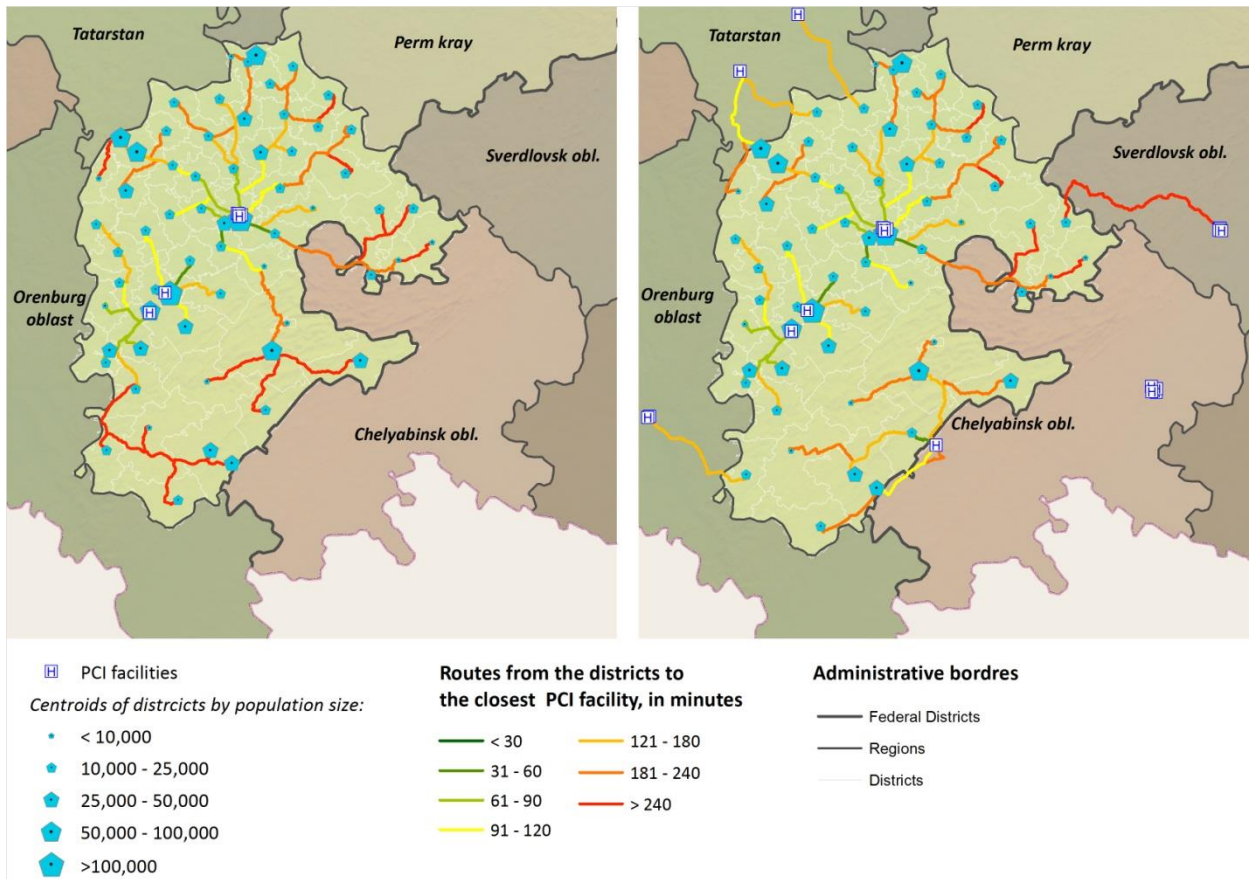

**Figure S-2. Proportions of adults 40+ years lived within 60 minutes driving time to the closest PCI facility in 2015**

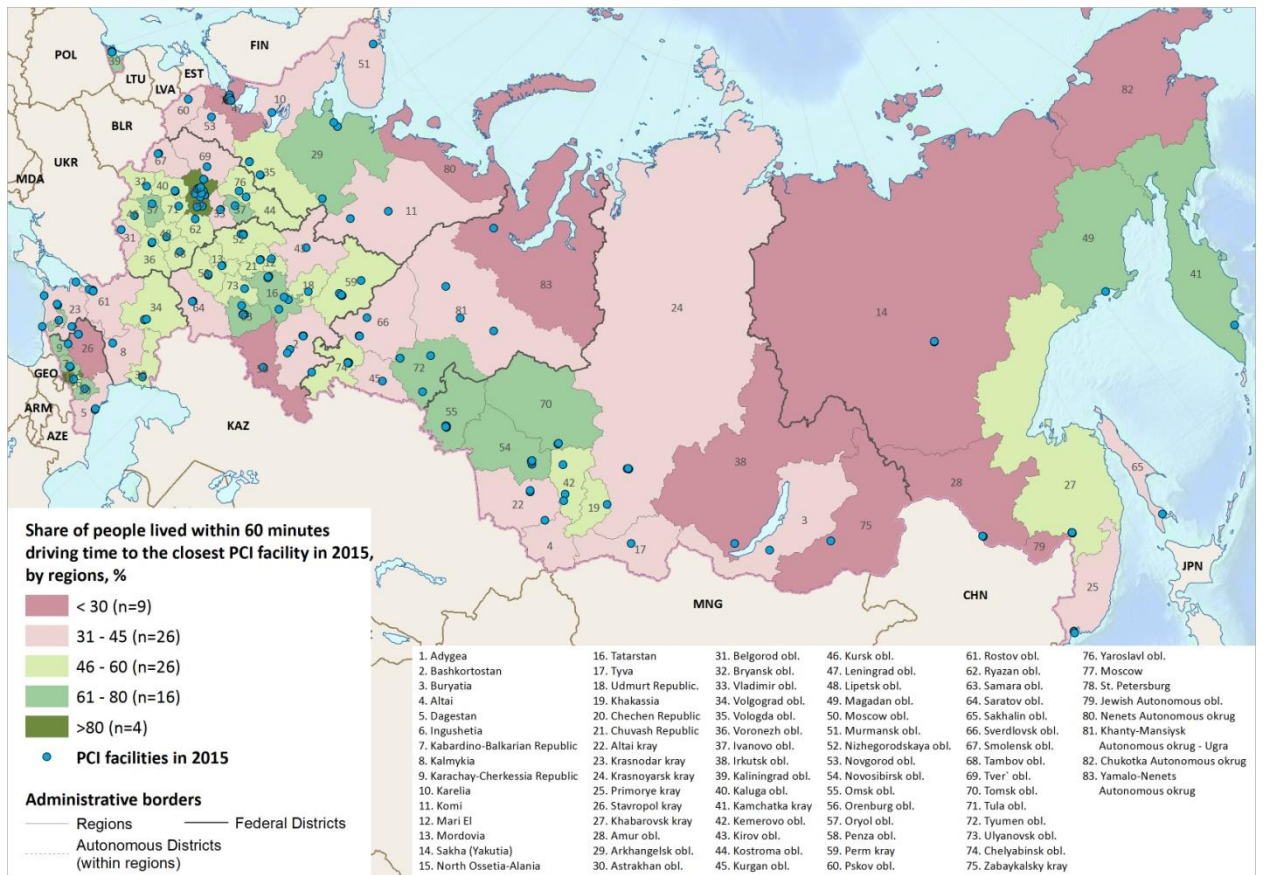

**Figure S-3. Districts of Russia by the location of the closest PCI facility in 2015**

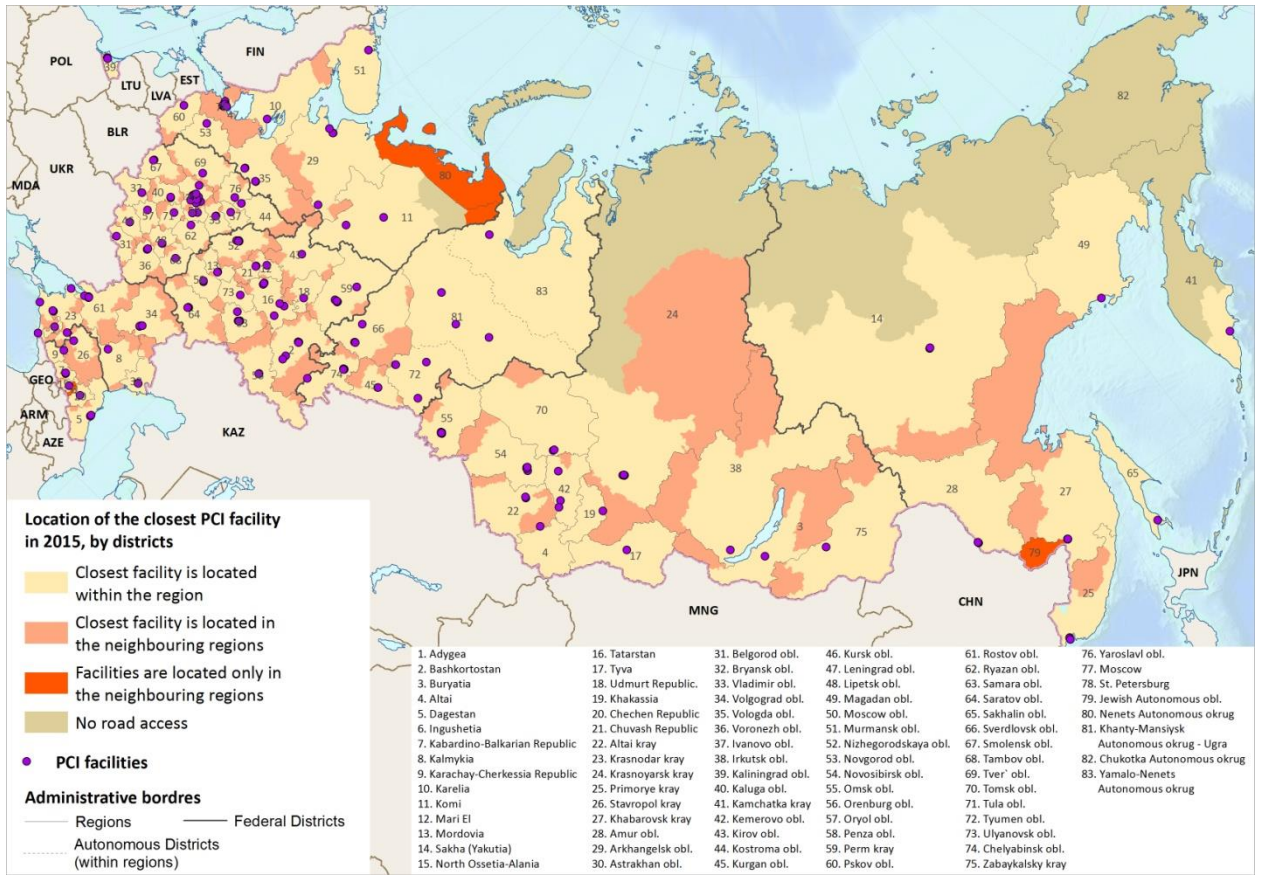



**Figure S-4. Proportions of adults 40+ years who could live within 60 minutes driving time to the closest PCI facility**

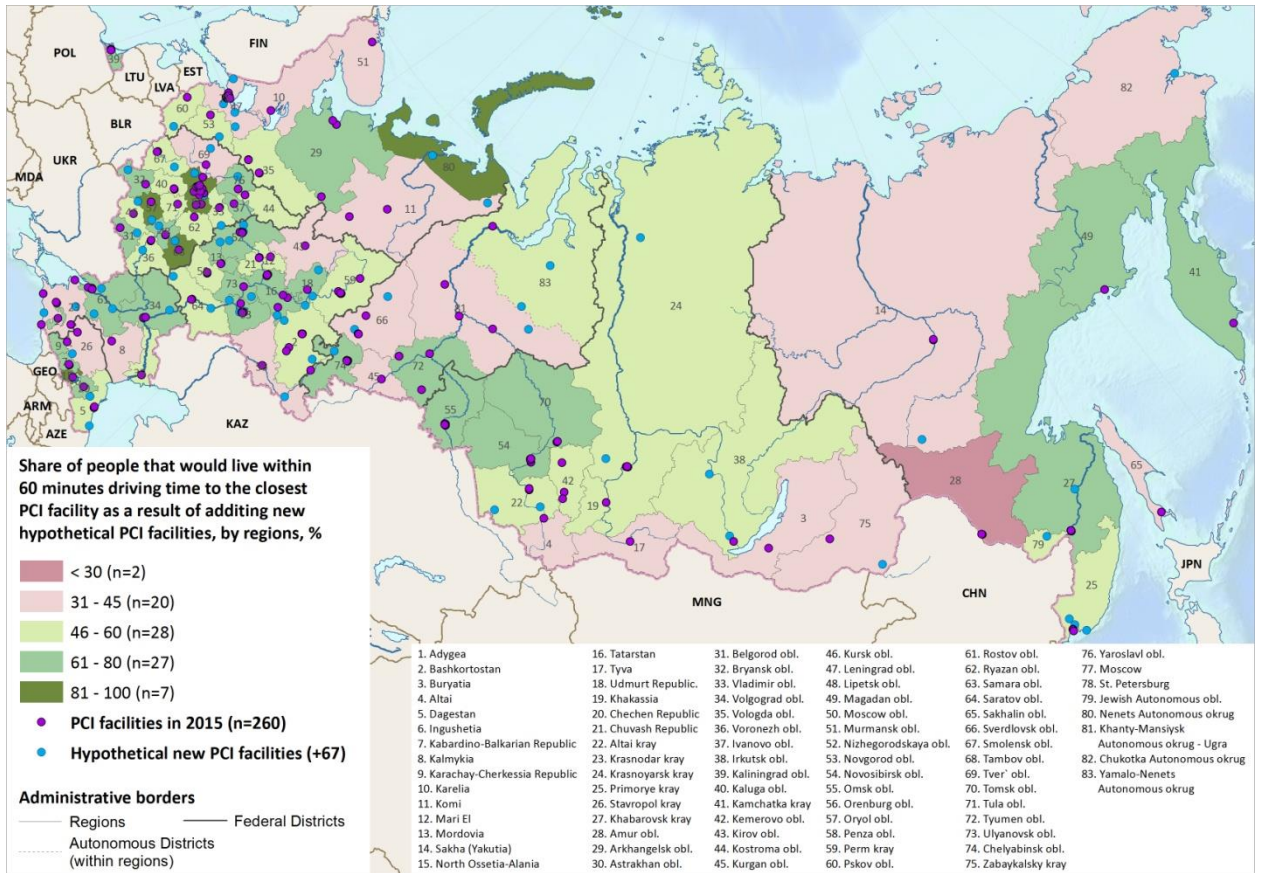

**Table S-1. Selected indicators of timely access to the PCI facilities in federal districts, 2010 and 2015**

| Federal districts     | Adult s aged 40+ years, mln | 2010                    |                    |                     |                   | 2015                    |                    |                     |                   |
|-----------------------|-----------------------------|-------------------------|--------------------|---------------------|-------------------|-------------------------|--------------------|---------------------|-------------------|
|                       |                             | Median time (IQR), mins | 60 mins acces s, % | 120 mins acces s, % | No road access, % | Median time (IQR), mins | 60 mins acces s, % | 120 mins acces s, % | No road access, % |
| <b>Central</b>        | 19.4                        | 23.9<br>(9.5-83.3)      | 64.3               | 86.1                | 0.0               | 14.9<br>(7.2-74.2)      | 69.1               | 89.6                | 0.0               |
| <b>North-West</b>     | 6.7                         | 23.4<br>(7.2-120.1)     | 58.1               | 74.9                | 1.2               | 14.8<br>(6.8-104.8)     | 61.9               | 78.3                | 0.6               |
| <b>Volga</b>          | 14.4                        | 80.1<br>(14.1-141.2)    | 40.9               | 67.3                | 0.0               | 58.3<br>(11.5-124.8)    | 50.3               | 73.2                | 0.0               |
| <b>South</b>          | 6.7                         | 105.2<br>(19.9-173.8)   | 30.8               | 53.5                | 0.0               | 75.2<br>(8.6-126.7)     | 43.2               | 72.0                | 0.0               |
| <b>North Caucasus</b> | 3.5                         | 108.7<br>(62.2-165.6)   | 22.7               | 56.1                | 0.0               | 79.7<br>(31.4-117.2)    | 41.3               | 76.7                | 0.0               |
| <b>Ural</b>           | 5.5                         | 100.2<br>(8.8-168.6)    | 37.8               | 60.5                | 0.6               | 79.4<br>(8.4-134.8)     | 43.5               | 69.0                | 0.0               |
| <b>Siberian</b>       | 8.6                         | 121.9<br>(19.3-282.8)   | 35.5               | 49.2                | 1.0               | 71.3<br>(11-221.8)      | 45.8               | 60.6                | 1.0               |
| <b>Far East</b>       | 2.8                         | 245.9<br>(37.6-657.9)   | 30.0               | 32.3                | 7.1               | 159.4<br>(34.6-404.8)   | 38.8               | 42.9                | 2.6               |

**Table S-2. Improvements in timely access to advances medical treatment in federal districts by creating 67 new PCI facilities**

| Federal districts     | Adults aged 40+ years, mln | The hypothetical conditions (creating 67 new PCI facilities) |                  |                   | Changes in comparison with 2015 |                               |                                            |                                             |
|-----------------------|----------------------------|--------------------------------------------------------------|------------------|-------------------|---------------------------------|-------------------------------|--------------------------------------------|---------------------------------------------|
|                       |                            | Median time (IQR), mins                                      | 60 min access, % | 120 min access, % | Number of hospitals added       | Decrease in median time, mins | Increase in 60 mins access, percent points | Increase in 120 mins access, percent points |
| <b>Central</b>        | 19.4                       | 13.4<br>(7.1-59.8)                                           | 75.1             | 94.6              | 13                              | 1.5                           | 6.0                                        | 5.0                                         |
| <b>North-West</b>     | 6.7                        | 13.2<br>(6.7-83.3)                                           | 68.0             | 83.3              | 8                               | 1.6                           | 6.1                                        | 5.0                                         |
| <b>Volga</b>          | 14.4                       | 35.1<br>(9.9-97)                                             | 60.3             | 84.5              | 16                              | 23.2                          | 10.0                                       | 11.3                                        |
| <b>South</b>          | 6.7                        | 55.1<br>(8.6-90.4)                                           | 52.7             | 84.3              | 6                               | 20.2                          | 9.5                                        | 12.2                                        |
| <b>North Caucasus</b> | 3.5                        | 55.8<br>(13.9-84.9)                                          | 56.2             | 85.0              | 4                               | 23.9                          | 14.9                                       | 8.3                                         |
| <b>Ural</b>           | 5.5                        | 58.9<br>(9.0-116.6)                                          | 51.3             | 75.8              | 6                               | 20.4                          | 7.8                                        | 6.8                                         |
| <b>Siberian</b>       | 8.6                        | 47.3<br>(11.1-163.2)                                         | 53.5             | 68.3              | 7                               | 24.1                          | 7.7                                        | 7.7                                         |
| <b>Far East</b>       | 2.8                        | 52.6<br>(15.9-235.3)                                         | 51.6             | 63.1              | 7                               | 106.7                         | 12.8                                       | 20.2                                        |
